# Supplementary material for: Integrated chemical profiling of Zhi-Zi-Hou-Po decoction by liquid chromatography-diode array detector-time of flight mass analyzer and liquid chromatography-triple stage quadrupole mass analyzer combined with chemometrics
Source: Royal Society of Chemistry journal article supplement (doi:10.1039/c6ay01233g), 2016-01-01
Supplement: c6ay01233g1.pdf [file c6ay01233g1.pdf]

**Supplementary information:**

**Integrated chemical profiling of Zhi-Zi-Hou-Po Decoction by liquid chromatography-diode array detector-time of flight mass analyzer and liquid chromatography-triple stage quadrupole mass analyzer combined with chemometrics**

**Yuan Liu,<sup>ab</sup> Gongjun Yang<sup>\*b</sup> and Fang Feng<sup>\*ab</sup>**

<sup>a</sup>Department of Pharmaceutical Analysis, China Pharmaceutical University, Nanjing 210009, China

<sup>b</sup>Key Laboratory of Drug Quality Control and Pharmacovigilance (China Pharmaceutical University), Ministry of Education, Nanjing 210009, China

**\*Corresponding author:**

Fang Feng, Ph.D., Professor

Phone: +86 025 8327 1301

E-mail: fengfang1@hotmail.com

Gongjun Yang, Ph.D., Professor

E-mail: gjyang@cpu.edu.cn

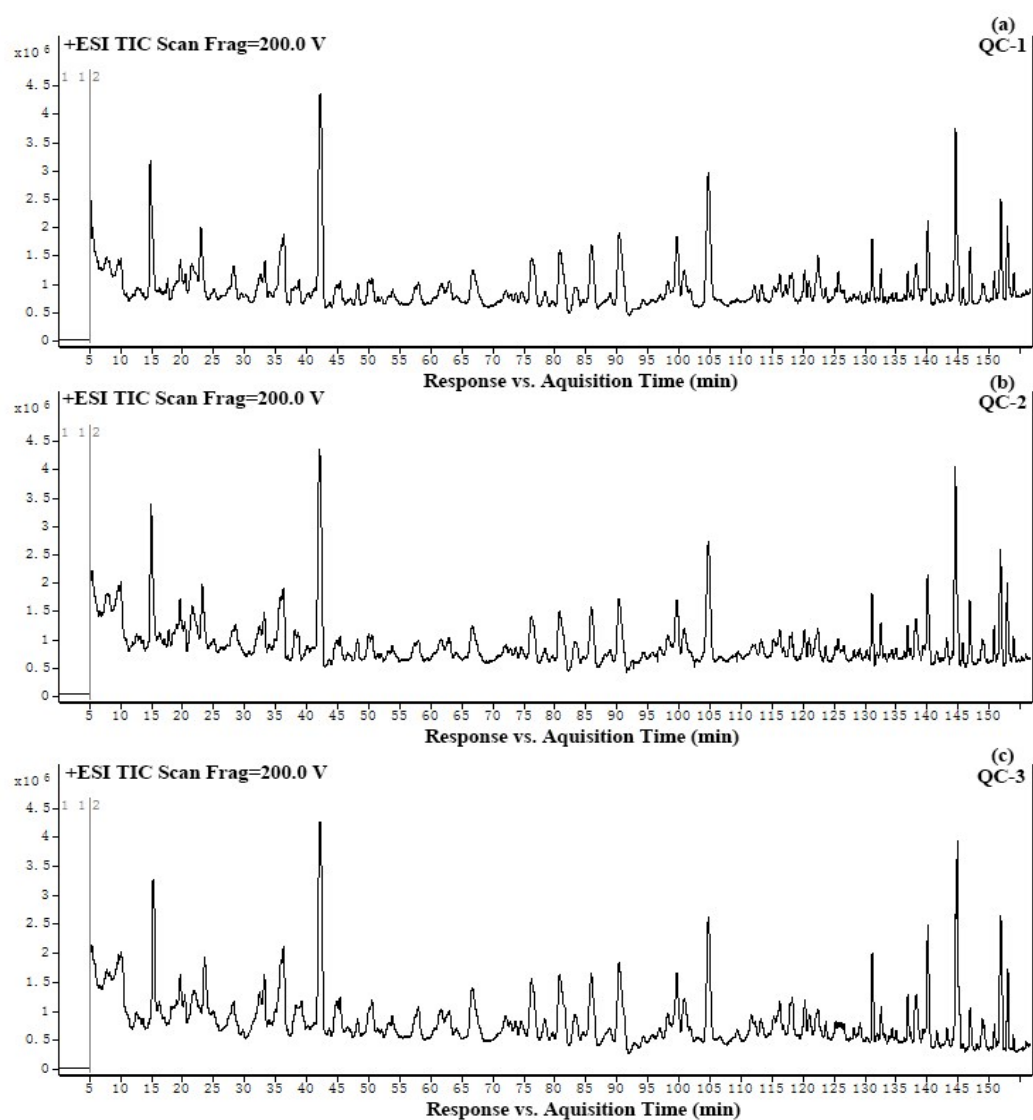

**Fig. S1** The total ion chromatograms in positive ion mode of three consecutive runs

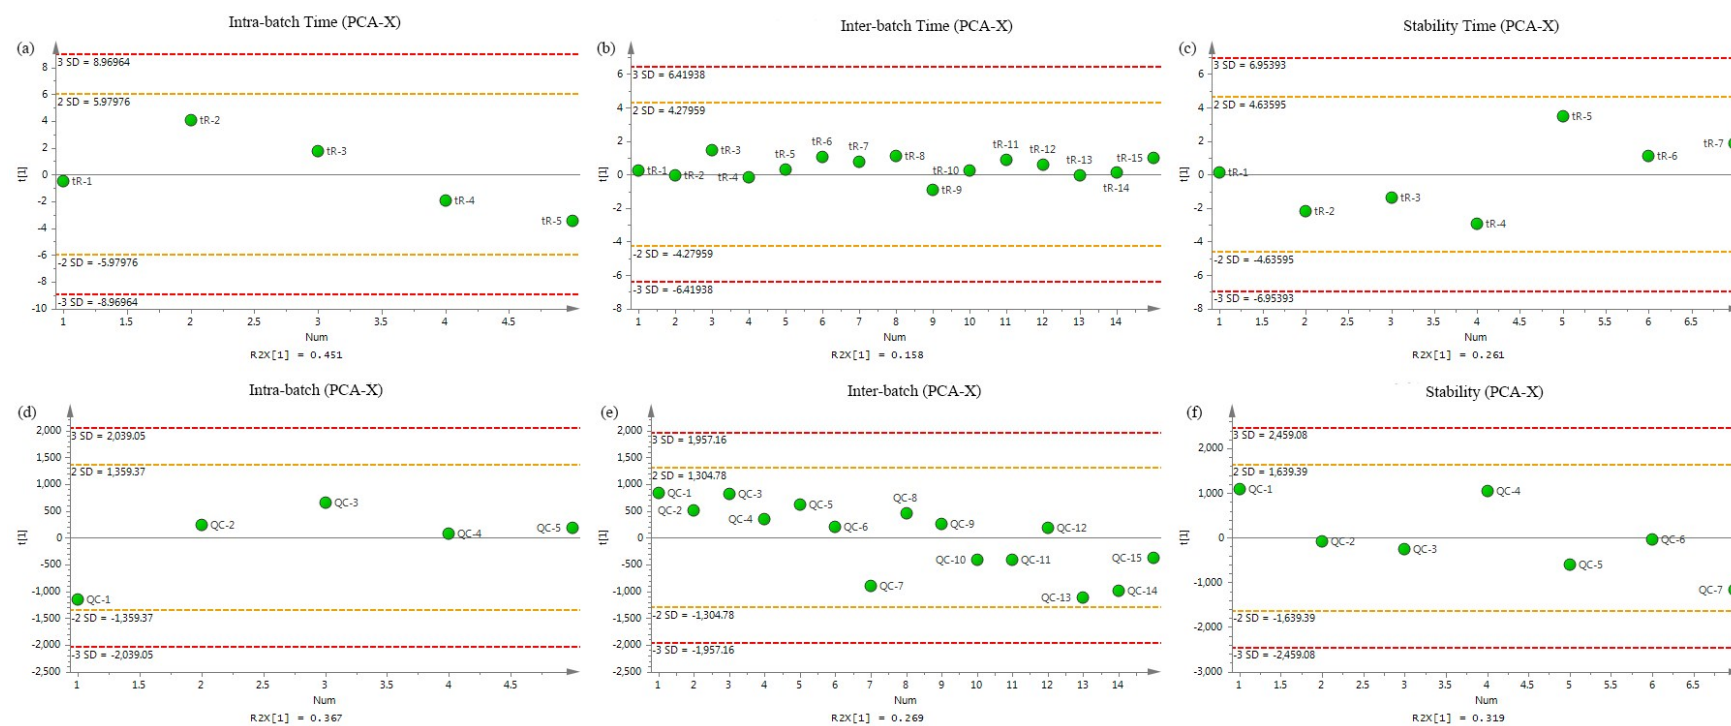

**Fig. S2** PCA first component for the QC samples versus time: (a) retention time in intra-batch experiments; (b) retention time in inter-batch experiments; (c) retention time in stability experiments; (d) ion intensity in intra-batch experiments; (e) ion intensity in inter-batch experiments; (f) ion intensity in stability experiments.

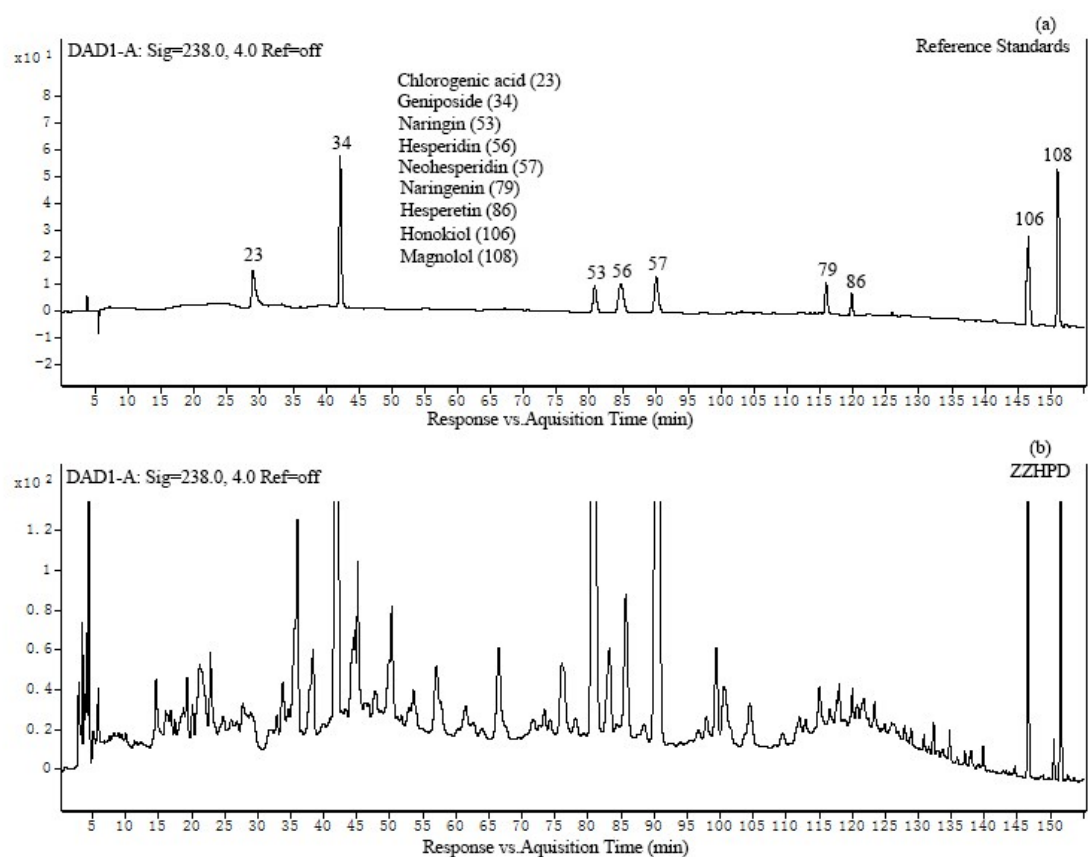

**Fig. S3** HPLC-DAD chromatograph of 9 reference standards (a) and ZZHPD extract (b) monitored at 238 nm.

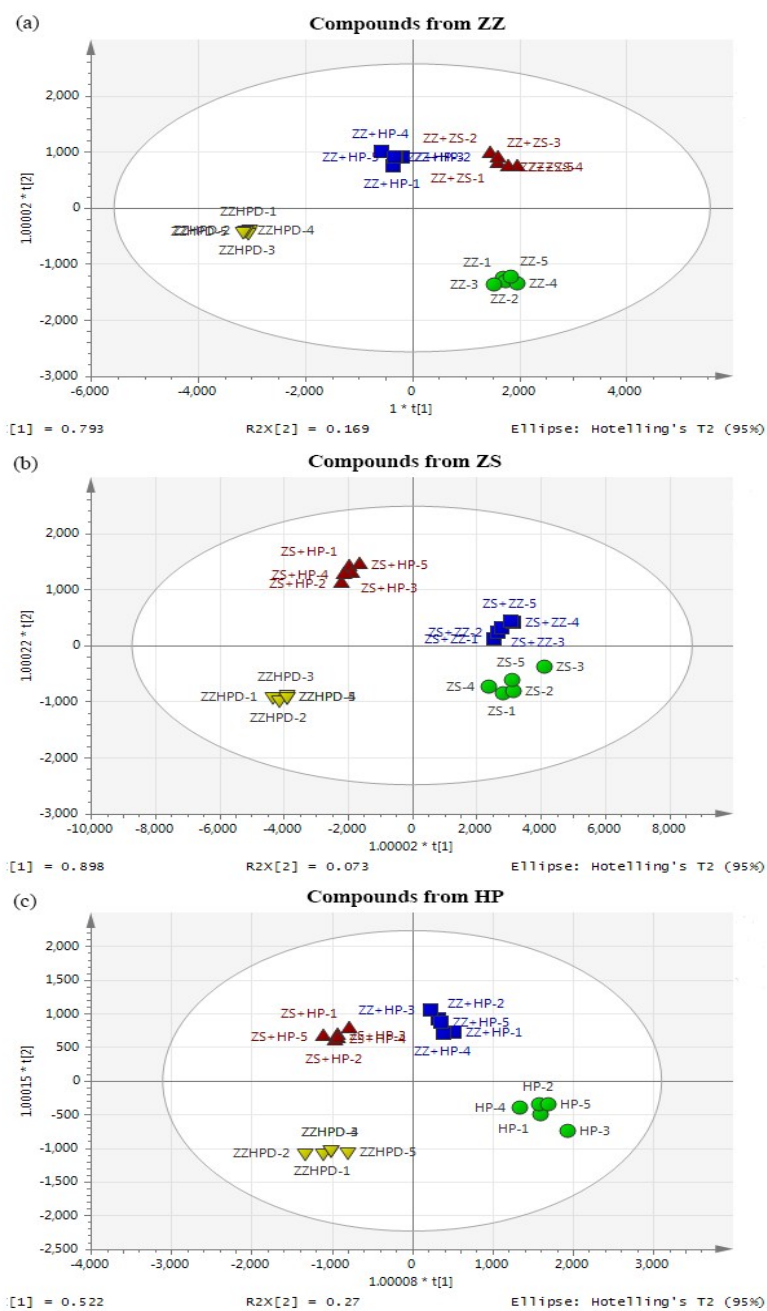

**Fig. S4** Scores plots of OPLS-DA models for components in ZZ, ZS and HP with the statistical parameters as follows: (a)  $R^2X=0.988$ ,  $R^2Y=0.986$ ,  $Q^2=0.962$ ; (b)  $R^2X=0.989$ ,  $R^2Y=0.973$ ,  $Q^2=0.957$ ; (c)  $R^2X=0.944$ ,  $R^2Y=0.981$ ,  $Q^2=0.944$ .
